# Supplementary material
Source: Springer Nature journal article supplement (https://www.springermedizin.de/resource/supplementary/12958_2010_720_MOESM2_ESM.pdf/9568684)

7.5 10.5 13.5 17.5 gd

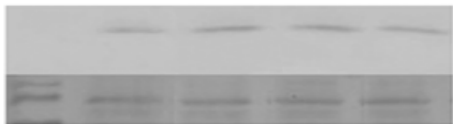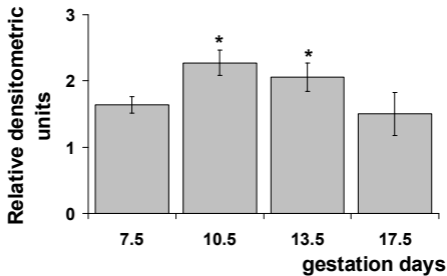

Supplement: MOESM2 [file 9568684]
